# 1 KrakenHLL: Confident and fast metagenomics classification using 2 unique k-mer counts

3 Breitwieser FP<sup>1</sup> and Salzberg SL<sup>1,2</sup>

4 1 Center for Computational Biology, McKusick-Nathans Institute of Genetic Medicine, Johns  
5 Hopkins School of Medicine, Baltimore, MD, United States

6 2 Departments of Biomedical Engineering, Computer Science and Biostatistics, Johns Hopkins  
7 University, Baltimore, MD, United States

8

## 9 **Abstract**

10 False positive identifications are a significant problem in metagenomic classification. We present  
11 KrakenHLL, a novel metagenomic classifier that combines the fast k-mer based classification of  
12 Kraken with an efficient algorithm for assessing the coverage of unique k-mers found in each  
13 species in a dataset. On various test datasets, KrakenHLL gives better recall and F1-scores than  
14 other methods, and effectively classifies and distinguishes pathogens with low abundance from  
15 false positives in infectious disease samples. By using the probabilistic cardinality estimator  
16 HyperLogLog (HLL), KrakenHLL is as fast as Kraken and requires little additional memory.

17

18 **Keywords:** metagenomics, microbiome, metagenomics classification, pathogen detection,  
19 infectious disease diagnosis

## 20 **Background**

21 Metagenomic classifiers attempt to assign a taxonomic identity to each read in a data set.

22 Because metagenomics data often contain tens of millions of reads, classification is typically

23 done using exact matching of short words of length  $k$  ( $k$ -mers) rather than alignment, which  
24 would be unacceptably slow. The results contain read classifications but not their aligned  
25 positions in the genomes [as reviewed by 1]. However, read counts can be deceiving. Sequence  
26 contamination of the samples—introduced from laboratory kits or the environment during sample  
27 extraction, handling or sequencing—can yield high numbers of spurious identifications [2, 3].  
28 Having only small amounts of input material can further compound the problem of  
29 contamination. When using sequencing for clinical diagnosis of infectious diseases, for example,  
30 less than 0.1% of the DNA may derive from microbes of interest [4, 5]. Additional spurious  
31 matches can result from low-complexity regions of genomes and from contamination in the  
32 database genomes themselves [6].

33

34 Such false-positive reads typically match only small portions of a genome; e.g., if a species'  
35 genome contains a low-complexity region, and the only reads matching that species fall in this  
36 region, then the species was probably not present in the sample. Reads from microbes that are  
37 truly present should distribute relatively uniformly across the genome rather than being  
38 concentrated in one or a few locations. Genome alignment can reveal this information. However,  
39 alignment is resource intensive, requiring the construction of indexes for every genome and a  
40 relatively slow alignment step to compare all reads against those indexes. Some metagenomics  
41 methods do use coverage information to improve mapping or quantification accuracy, but these  
42 methods require results from much slower alignment methods as input [7]. Assembly-based  
43 methods also help to avoid false positives, but these are useful only for highly abundant species  
44 [8].

45

46 Here, we present KrakenHLL, a novel method that combines very fast k-mer based classification  
47 with a fast k-mer cardinality estimation. KrakenHLL is based on the Kraken metagenomics  
48 classifier [9], to which it adds a method for counting the number of unique k-mers identified for  
49 each taxon using the efficient cardinality estimation algorithm HyperLogLog [10-12]. By  
50 counting how many of each genome's unique k-mers are covered by reads, KrakenHLL can  
51 often discern false positive from true positive matches. Furthermore, KrakenHLL implements  
52 additional new features to improve metagenomics classification: (a) searches can be done against  
53 multiple databases hierarchically, (b) the taxonomy can be extended to include nodes for strains  
54 and plasmids, thus enabling their detection, and (c) the database build script allows the addition  
55 of >100,000 viruses from the NCBI Viral Genome Resource [13]. KrakenHLL provides a  
56 superset of the information provided by Kraken while running equally fast or slightly faster, and  
57 while using very little additional memory during classification.

## 58 Results

59 KrakenHLL was developed to provide efficient k-mer count information for all taxa identified in  
60 a metagenomics experiment. The main workflow is as follows: As reads are processed, each k-  
61 mer is assigned a taxon from the database (Figure 1A). KrakenHLL instantiates a HyperLogLog  
62 data sketch for each taxon, and adds the k-mers to it (Figure 1B and Supplementary  
63 Information). After classification of a read, KrakenHLL traverses up the taxonomic tree and  
64 merges the estimators of each taxon with its parent. In its classification report, KrakenHLL  
65 includes the number of unique k-mers and the depth of k-mer coverage for each taxon that it  
66 observed in the input data (Figure 1C).

67

68

[FIGURE 1]

69 **Figure 1.** Overview of the KrakenHLL algorithm and output. (A) An input read is shown as a  
70 long gray rectangle, with k-mers shown as shorter rectangles below it. The taxon mappings for  
71 each k-mer are compared to the database, shown as larger rectangles on the right. For each taxon,  
72 a unique k-mer counter is instantiated, and the observed k-mers (K7, K8, and K9) are added to  
73 the counters. (B) Unique k-mer counting is implemented with the probabilistic estimation  
74 method HyperLogLog (HLL) using 16KB of memory per counter, which limits the error in the  
75 cardinality estimate to 1% (see main text). (C) The output includes the number of reads, unique  
76 k-mers, duplicity (average time each k-mer has been seen) and coverage for each taxon observed  
77 in the input data.

78  
79

## 80 **Efficient k-mer cardinality estimation using the HyperLogLog algorithm**

81 Cardinality is the number of elements in a set without duplicates; *e. g.* the number of distinct  
82 words in a text. An exact count can be kept by storing the elements in a sorted list or linear  
83 probing hash table, but that requires memory proportional to the number of unique elements.  
84 When an accurate estimate of the cardinality is sufficient, however, the computation can be done  
85 efficiently with very small amount of fixed memory. The HyperLogLog algorithm (HLL) [10],  
86 which is well suited for k-mer counting [14], keeps a summary or *sketch* of the data that is  
87 sufficient for precise estimation of the cardinality, but requires only a small amount of constant  
88 space to estimate cardinalities up to billions. The method centers on the idea that long runs of  
89 leading zeros, which can be efficiently computed using machine instructions, are unlikely in  
90 random bitstrings. For example, about every fourth bitstring in a random series should start with  
91  $01_2$  (one 0-bit before the first 1-bit), and about every  $32^{\text{nd}}$  hash starts with  $00001_2$ . Conversely, if  
92 we know the maximum number of leading zeros  $k$  of the members of a random set, we can use

93  $2^{k+1}$  as a crude estimate of its cardinality (more details in the Suppl. Methods). HLL keeps  $m=2^p$   
94 one-byte counts of the maximum numbers of leading zeros on the data (its data *sketch*), with  $p$ ,  
95 the precision parameter, typically between 10 and 18 (see Figure 2). For cardinalities up to  $m/4$ ,  
96 we use the sparse representation of the registers suggested by Heule et al. [11] that has the much  
97 higher effective precision  $p'$  of 25 by encoding each index and count in a vector of four-byte  
98 values. To add a k-mer to its taxon's sketch, the k-mer (with  $k$  up to 31) is first mapped by a hash  
99 function to a 64-bit hash value. Note that k-mers that contain non-A, C, G or T characters (such  
100 as ambiguous IUPAC characters) are ignored by KrakenHLL. The first  $p$  bits of the hash value  
101 are used as index  $i$ , and the later  $64-p=q$  bits for counting the number of leading zeros  $k$ . The  
102 value of the register  $M[i]$  in the sketch is updated if  $k$  is larger than the current value of  $M[i]$ .

103

104 When the read classification is finished, the taxon sketches are aggregated up the taxonomy tree  
105 by taking the maximum of each register value. The resulting sketches are the same as if the k-  
106 mers were counted at their whole lineage from the beginning. KrakenHLL then computes  
107 cardinality estimates using the formula proposed by Ertl [12], which has theoretical and practical  
108 advantages and does not require empirical bias correction factors [10, 11]. In our tests it  
109 performed better than Flajolet's and Heule's methods (Suppl. Figures 1 and 2).

110

111 The expected relative error of the final cardinality estimate is approximately  $1.04/\sqrt{2^p}$  [10].  
112 With  $p=14$ , the sketch uses  $2^{14}$  one-byte registers, i.e. 16 KB of space, and gives estimates with  
113 relative errors of less than 1% (Figure 2). An exact counter would require about 40 MB per  
114 million distinct k-mers when implemented using an unordered set; i. e. about 40 GB for the  
115 pathogen identification samples with an average of one billion distinct k-mers per sample.

116 However, unordered sets have worst case insertion time complexity linear to the container size  
117 (and require re-hashes on resize), while it is constant for HLL.

118

[FIGURE 2]

| $p$ | $m=2^p$ | Space (kB) | Rel. Error |
|-----|---------|------------|------------|
| 10  | 1024    | 1          | 3.25%      |
| 11  | 2048    | 2          | 2.23%      |
| 12  | 4096    | 4          | 1.63%      |
| 13  | 8192    | 8          | 1.15%      |
| 14  | 16384   | 16         | 0.81%      |
| 15  | 32768   | 32         | 0.57%      |
| 16  | 65536   | 64         | 0.41%      |
| 17  | 131072  | 128        | 0.29%      |
| 18  | 262144  | 256        | 0.20%      |
| 25  |         |            | 0.02%      |

119 Figure 2: Cardinality estimation using HyperLogLog for randomly sampled k-mers from  
120 microbial genomes. Left: standard deviations of the relative errors of the estimate with precision  
121  $p$  ranging from 10 to 18. No systematic biases are apparent, and, as expected, the errors decrease  
122 with higher values of  $p$ . Up to cardinalities of about  $2^p/4$ , the relative error is near zero. At higher  
123 cardinalities, the error boundaries stay near constant. Right: the size of the registers, space  
124 requirement, and expected relative error for HyperLogLog cardinality estimates with different  
125 values of  $p$ . For example, with a precision  $p=14$ , the expected relative error is 0.81% and the  
126 counter only requires 16 KB of space, which is three orders of magnitude less than that of an  
127 exact counter (at a cardinality of one million). Up to cardinalities of  $2^p/4$ , KrakenHLL uses a  
128 sparse representation of the counter with a higher precision of 25 and an effective relative error  
129 rate of about 0.02%.

130

## 131 **Results on twenty-one simulated and ten biological test datasets**

132 We assessed KrakenHLL's performance on the 34 datasets compiled by McIntyre et al. [15] (see  
133 Suppl. Table 3). We place greater emphasis on the eleven biological datasets, which contain  
134 more realistic laboratory and environmental contamination. In the first part of this section, we  
135 show that unique k-mer counts provide higher classification accuracy than read counts, and in  
136 the second part we compare KrakenHLL with the results of eleven metagenomics classifiers. We  
137 ran KrakenHLL on three databases: 'orig', the database used by McIntyre et al., 'std', which  
138 contains all current complete bacterial, archaeal and viral genomes from RefSeq plus viral  
139 neighbor sequences and the human reference genome, and 'nt', which contains all microbial  
140 sequences (including fungi and protists) in the non-redundant nucleotide collection nr/nt  
141 provided by NCBI (see Suppl. Methods Section 2 for details). The 'std' database furthermore  
142 includes the UniVec and EmVec sequence sets of synthetic constructs and vector sequences; and  
143 low-complexity k-mers in microbial sequences were masked using NCBI's dustmasker with  
144 default settings. We use two metrics to compare how well methods can separate true positives  
145 and false positives: (a) F1 score, i. e. the harmonic mean of precision  $p$  and recall  $r$ , and (b) recall  
146 at a maximum false discovery rate (FDR) of 5%. For each method, we compute and select the  
147 ideal thresholds based on the read count, k-mer count or abundance calls. Precision  $p$  is defined  
148 as the number of correctly called species (or genera) divided by the number of all called species  
149 (or genera) at a given threshold. Recall  $r$  is the proportion of species (or genera) that are in the  
150 test dataset and that are called at a given threshold. Higher F1 scores indicate a better separation  
151 between true positives and false positives. Higher recall means that more true species can be  
152 recovered while controlling the false positives.

153

154 Because the NCBI taxonomy has been updated since the datasets were published, we manually  
 155 updated the "truth" sets in several datasets (see Suppl. Methods Section 2.3 for all changes). Any  
 156 cases that might have been missed would result in a lower apparent performance of KrakenHLL.  
 157 Note that we exclude the over ten-year-old simulated datasets simHC, simMC and simLC from  
 158 Mavromatis et al. (2007), as well as the biological dataset JGI SRR033547 which has only 100  
 159 reads.

| Data Type | Rank    | Statistic | orig  |       |              | std   |       |               | nt    |       |              |
|-----------|---------|-----------|-------|-------|--------------|-------|-------|---------------|-------|-------|--------------|
|           |         |           | Reads | Kmers | Diff         | Reads | Kmers | Diff          | Reads | Kmers | Diff         |
| Bio       | Genus   | Recall    | 0.90  | 0.93  | <b>+4.0%</b> | 0.89  | 0.94  | <b>+6.2%</b>  | 0.91  | 0.99  | <b>+8.9%</b> |
|           |         | F1        | 0.95  | 0.96  | <b>+1.8%</b> | 0.95  | 0.97  | <b>+2.6%</b>  | 0.96  | 0.99  | <b>+3.4%</b> |
|           | Species | Recall    | 0.85  | 0.87  | <b>+2.6%</b> | 0.70  | 0.78  | <b>+11.8%</b> | 0.95  | 0.98  | <b>+3.1%</b> |
|           |         | F1        | 0.94  | 0.94  | <b>+0.7%</b> | 0.90  | 0.92  | <b>+2.5%</b>  | 0.97  | 0.99  | <b>+1.6%</b> |
| Sim       | Genus   | Recall    | 0.96  | 0.94  | -2.1%        | 0.95  | 0.97  | <b>+2.5%</b>  | 0.98  | 0.99  | <b>+0.8%</b> |
|           |         | F1        | 0.98  | 0.98  | -0.0%        | 0.98  | 0.98  | <b>+0.3%</b>  | 0.99  | 0.99  | <b>+0.3%</b> |
|           | Species | Recall    | 0.92  | 0.93  | <b>+0.6%</b> | 0.88  | 0.88  | <b>+0.3%</b>  | 0.90  | 0.90  | -0.1%        |
|           |         | F1        | 0.97  | 0.97  | <b>+0.3%</b> | 0.94  | 0.94  | <b>+0.5%</b>  | 0.96  | 0.96  | -0.1%        |

160  
 161 Table 1: Performance of read count and unique k-mer thresholds on 10 biological and 21  
 162 simulated datasets against three databases ('orig', 'std', 'nt'). Unique k-mer count thresholds give  
 163 up to 10% better recall and F1 scores, particularly for the biological datasets.

### 165 *Unique k-mer versus read count thresholds*

166 We first looked at the performance of the unique k-mer count thresholds versus read count  
 167 thresholds (as would be used with Kraken). The k-mer count thresholds worked very well,  
 168 particularly for the biological datasets (Table 1 and Suppl. Table 3). On the genus level, the  
 169 average recall in the biological datasets increases by 4-9%, and the average F1 score increases 2-  
 170 3%. On the species level, the average increase in recall in the biological sets is between 3 and  
 171 12%, and the F1 score increases by 1-2%.



172

173 On the simulated datasets, the differences are less pronounced and vary between databases, even  
174 though on average the unique k-mer count is again better. However, only in two cases (genus  
175 recall on databases ‘orig’ and ‘std’) the difference is higher than 1% in any direction. We find  
176 that simulated datasets often lack false positives with a decent number of reads but a lower  
177 number of unique k-mer counts, which we see in real data. Instead, in most simulated datasets  
178 the number of unique k-mers is linearly increasing with the number of unique reads in both true  
179 and false positives (Suppl. Figure 4). In biological datasets, sequence contamination and lower  
180 read counts for the true positives make the task of separating true and false positives harder.

181

### 182 ***Comparison of KrakenHLL with eleven other methods***

183 Next, we compared KrakenHLL’s unique k-mer counts with the results of eleven metagenomics  
184 classifiers from McIntyre et al. [15], which include the alignment-based methods Blast + Megan  
185 [16, 17], Diamond + Megan [17, 18] and MetaFlow [19], the k-mer based CLARK [20],  
186 CLARK-S [21], Kraken [9], LMAT [22], NBC [23] and the marker-based methods GOTTECHA  
187 [24], MetaPhlan2 [25], PhyloSift [26]. KrakenHLL with database ‘nt’ has the highest average  
188 recall and F1 score across the biological datasets, as shown in Table 2. As seen before, using  
189 unique k-mer instead of read counts as thresholds increases the scores. While the database  
190 selection proves to be very important (KrakenHLL with database ‘std’ is performing 10% worse  
191 than KrakenHLL with database ‘nt’), only Blast has higher average scores than KrakenHLL with  
192 k-mer count thresholds on the original database. On the simulated datasets, KrakenHLL with the  
193 ‘nt’ database still ranks at the top, though, as seen previously there is more variation (Suppl.

194 Table 4). Notably CLARK is as good as KrakenHLL, but Blast has much worse scores on the  
195 simulated datasets.

196

|                           | Genus       |             | Species     |             | Avg         |
|---------------------------|-------------|-------------|-------------|-------------|-------------|
|                           | F1          | Recall      | F1          | Recall      |             |
| KrakenHLL nt kmers        | <b>0.99</b> | <b>0.99</b> | <b>0.99</b> | <b>0.98</b> | <b>0.99</b> |
| KrakenHLL nt reads        | 0.96        | 0.91        | 0.97        | 0.95        | 0.95        |
| BlastMeganFilteredLiberal | 0.97        | 0.94        | 0.97        | 0.89        | 0.94        |
| BlastMeganFiltered        | 0.97        | 0.93        | 0.96        | 0.87        | 0.93        |
| KrakenHLL orig kmers      | 0.96        | 0.93        | 0.94        | 0.87        | 0.93        |
| ClarkM4Spaced             | 0.95        | 0.90        | 0.94        | 0.88        | 0.92        |
| KrakenHLL orig reads      | 0.95        | 0.90        | 0.94        | 0.85        | 0.91        |
| Kraken                    | 0.95        | 0.90        | 0.94        | 0.84        | 0.91        |
| KrakenHLL std kmers       | 0.97        | 0.94        | 0.92        | 0.78        | 0.90        |
| DiamondMegan_sensitive    | 0.98        | 0.93        | 0.92        | 0.74        | 0.89        |
| KrakenFiltered            | 0.95        | 0.91        | 0.90        | 0.75        | 0.88        |
| ClarkM1Default            | 0.94        | 0.85        | 0.91        | 0.77        | 0.87        |
| KrakenHLL std reads       | 0.95        | 0.89        | 0.90        | 0.70        | 0.86        |
| LMAT                      | 0.97        | 0.93        | 0.91        | 0.60        | 0.85        |
| DiamondMegan              | 0.94        | 0.87        | 0.91        | 0.66        | 0.85        |
| Gottcha                   | 0.91        | 0.84        | 0.87        | 0.67        | 0.82        |
| NBC                       | 0.87        | 0.76        | 0.85        | 0.73        | 0.80        |
| Metaphlan                 | 0.94        | 0.89        | 0.83        | 0.55        | 0.80        |
| MetaFlow                  | 0.66        | 0.53        | 0.65        | 0.51        | 0.59        |
| PhyloSift                 | 0.68        | 0.29        | 0.78        | 0.54        | 0.57        |
| PhyloSift90pct            | 0.68        | 0.30        | 0.77        | 0.52        | 0.57        |

197

198 Table 2: Performance of KrakenHLL (with unique k-mer count thresholds) compared to  
199 metagenomic classifiers [15] on the biological datasets (n=10). F1 and Recall show the average  
200 values over the datasets. Note that 'KrakenHLL reads' would be equivalent to standard Kraken.

201

## 202 **Generating a better test dataset, and selecting an appropriate k-mer threshold**

203 In the previous section we demonstrated that KrakenHLL gives better recall and F1-scores than  
204 other classifiers on the test datasets, given the correct thresholds. How can the correct thresholds  
205 be determined on real data with varying sequencing depths and complex communities? The test  
206 datasets are not ideal for that: The biological datasets lack complexity with a maximum of 25  
207 species in some of the samples, while the simulated samples lack the features of biological  
208 datasets.

209  
210 We thus generated a third type of test dataset by sampling reads from real bacterial isolate  
211 sequencing runs, of which there are tens of thousands in the Sequence Read Archive (SRA). That  
212 way we created a complex test dataset for which we know the ground truth, with all the features  
213 of real sequencing experiments, including lab contaminants and sequencing errors. We selected  
214 280 SRA datasets from 280 different bacterial species that are linked to complete RefSeq  
215 genomes (see Suppl. Methods Section 2.4). We randomly sampled between one hundred and one  
216 million reads (logarithmically distributed) from each experiment, which gave 34 million read  
217 pairs in total. Furthermore, we sub-sampled five read sets with between one to twenty million  
218 reads. All read sets were classified with KrakenHLL using the ‘std’ database.

219

220

[FIGURE 3]

221 Figure 3: Unique k-mer count separates true and false positives better than read counts in a  
222 complex dataset with ten million reads sampled from SRA experiments. Each dot represents a  
223 species, with true species in orange and false species in black. The dashed and dotted lines show  
224 the k-mer thresholds for the ideal F1 score and recall at a maximum of 5% FDR, respectively. In

225 this dataset, a unique k-mer count in the range 10000–20000 would give the best threshold for  
226 selecting true species.

227  
228 Consistent with the results of the previous section, we found that unique k-mer counts provide  
229 better thresholds than read counts both in terms of F1 score and recall in all test datasets (e.g.  
230 Figure 3 on ten million reads – species recall using k-mers is 0.85, recall using reads 0.76). With  
231 higher sequencing depth, the recall increased slightly - from 0.80 to 0.85 on the species level,  
232 and from 0.87 to 0.89 on the genus level. The ideal values of the unique k-mer count thresholds,  
233 however, vary widely with different sequencing depths. We found that the ideal thresholds  
234 increase by about 2000 unique k-mers per one million reads (see Figure 4). McIntyre et al. [15]  
235 found that k-mer based methods show a positive relationship between sequencing depths and  
236 misclassified reads. Our analysis also shows that with deeper sequencing depths higher  
237 thresholds are required to control the false-positive rate.

238

239

[FIGURE 4]

| No. of reads | Fraction | Genus     |        | Species   |        |
|--------------|----------|-----------|--------|-----------|--------|
|              |          | Threshold | Recall | Threshold | Recall |
| 1 million    | 0.03     | 2555      | 0.87   | 3682      | 0.80   |
| 2 million    | 0.06     | 4483      | 0.86   | 6152      | 0.81   |
| 5 million    | 0.15     | 12723     | 0.87   | 10459     | 0.85   |
| 10 million   | 0.3      | 21896     | 0.88   | 21201     | 0.85   |
| 20 million   | 0.6      | 43417     | 0.88   | 43417     | 0.84   |
| 34.3 million | 1        | 69847     | 0.89   | 688842    | 0.85   |

240

241 Figure 4: Deeper sequencing depths require higher unique k-mer count thresholds to control  
242 false-positive rate and achieve the best recall. A minimum threshold of about 2000 unique k-mer  
243 per a million reads gives the best results in this dataset (solid line in plot).

244

245 In general, we find that for correctly identified species, we obtain up to approximately  $L-k$   
246 unique k-mers per each read, where  $L$  is the read length, because each read samples a different  
247 location in the genome. (Note that once the genome is completely covered, no more unique k-  
248 mers can be detected.) Thus the k-mer threshold should always be several times higher than the  
249 read count threshold. For the discovery of pathogens in human patients, discussed in the next  
250 section, a read count threshold of 10 and unique k-mer count threshold of 1000 eliminated many  
251 background identifications while preserving all true positives, which were discovered from as  
252 few as 15 reads.

253

## 254 **Results on biological samples for infectious disease diagnosis**

255 Metagenomics is increasingly used to find species of low abundance. A special case is the  
256 emerging use of metagenomics for the diagnosis of infectious diseases [27, 28]. In this  
257 application, infected human tissues are sequenced directly to find the likely disease organism.  
258 Usually, the vast majority of the reads match (typically 95-99%) the host, and sometimes fewer  
259 than 100 reads out of many millions of reads are matched to the target species. Common skin  
260 bacteria from the patient or lab personnel and other contamination from sample collection or  
261 preparation can easily generate a similar number of reads, and thus mask the signal from the  
262 pathogen.

263

264 To assess if the unique k-mer count metric in KrakenHLL could be used to rank and identify  
265 pathogen from human samples, we reanalyzed ten patient samples from a previously described  
266 series of neurological infections [4]. That study sequenced spinal cord mass and brain biopsies

267 from ten hospitalized patients for whom routine tests for pathogens were inconclusive. In four of  
268 the ten cases, a likely diagnosis could be made with the help of metagenomics. To confirm the  
269 metagenomics classifications, the authors in the original study re-aligned all pathogen reads to  
270 individual genomes.

271  
272 Table 3 shows the results of our reanalysis of the confirmed pathogens in the four patients,  
273 including the number of reads and unique k-mers from the pathogen, as well as the number of  
274 bases covered by re-alignment to the genomes. Even though the read numbers are very low in  
275 two cases, the number of unique k-mers suggests that each read matches a different location in  
276 the genome. For example, in PT8, 15 reads contain 1570 unique k-mers, and re-alignment shows  
277 2201 covered base pairs. In contrast, Table 4 shows examples of identifications from the same  
278 datasets that are not well-supported by k-mer counts. We also examined the likely source of the  
279 false positive identifications by blasting the reads against the full nt database, and found rRNA of  
280 environmental bacteria, human RNA and PhiX-174 mis-assignments (see Suppl. Methods for  
281 details). Notably, the common laboratory and skin contaminants PhiX-174, *Escherichia coli*,  
282 *Cutibacterium acnes* and *Delftia* were detected in most of the samples, too (see Suppl. Table 6).  
283 However, those identifications are solid in terms of their k-mer counts - the bacteria and PhiX-  
284 174 are present in the sample, and the reads cover their genomes rather randomly. To discount  
285 them, comparisons against a negative control or between multiple samples is required (e.g. with  
286 Pavian [29]).

287  
288 Table 3: Validated pathogen identifications in patients with neurological infections have high  
289 numbers of unique k-mers per read. The pathogens were identified with as few as 15 reads, but

290 the high number of unique k-mers indicates distinct locations of the reads along their genomes.  
291 Re-alignment of mapped reads to their reference genomes (column “Covered Bases”)  
292 corroborates the finding of the unique k-mers (see also Suppl. Figure 5). Interestingly, the k-mer  
293 count in PT5 indicates that there might be multiple strains present in the sample since the k-mers  
294 cover more than one genome. Read lengths were 150-250 bp.

295  
296

| Sample | Matched microorganism              | Reads | K-mers | Covered Bases      |
|--------|------------------------------------|-------|--------|--------------------|
| PT5    | Human polyomavirus 2               | 9,650 | 7,129  | 5,130 / 5,130      |
| PT7    | <i>Elizabethkingia genomosp. 3</i> | 403   | 20,724 | 53,256 / 4,433,522 |
| PT8    | <i>Mycobacterium tuberculosis</i>  | 15    | 1,570  | 2,227 / 4,411,532  |
| PT10   | Human gammaherpesvirus 4           | 20    | 2,084  | 2,822 / 172,764    |

297

298 Table 4: False positive identifications have few unique k-mers. Using an extended taxonomy, the  
299 identifications in PT4 and PT10 were matched to single accessions (instead of to the species  
300 level). The likely true source of the mapped sequences was determined by subsequent BLAST  
301 searches and included 16S rRNA present in many uncultured bacteria, human small nucleolar  
302 RNAs (snRNAs), and phiX174.

| Sample | Matched microorganism                                                                   | Reads | K-mers | Source         |
|--------|-----------------------------------------------------------------------------------------|-------|--------|----------------|
| PT3    | <i>Clostridioides difficile</i>                                                         | 122   | 126    | 16S rRNA       |
| PT4    | Hepatitis C virus<br>JF343788.1 Recombinant Hepatitis C virus                           | 101   | 3      | Human<br>snRNA |
| PT5    | <i>Akkermansia muciniphila</i>                                                          | 936   | 136    | 16S rRNA       |
| PT10   | Human betaherpesvirus 5<br>JN379815.1 Human herpesvirus 5 strain<br>U04, partial genome | 63    | 5      | phiX174        |

303

304

## 305 **Further extensions in KrakenHLL**

306 KrakenHLL adds three further notable features to the classification engine.

307 1. Enabling strain identification by extending the taxonomy: The finest level of granularity  
308 for Kraken classifications are nodes in the NCBI taxonomy. This means that many strains  
309 cannot be resolved, because up to hundreds of strains share the same taxonomy ID.

310 KrakenHLL allows extending the taxonomy with virtual nodes for genomes,  
311 chromosomes and plasmids, and thus enabling identifications at the most specific levels  
312 (see Suppl. Methods Section 3)

313 2. Integrating 100,000 viral strain sequences: RefSeq includes only one reference genome  
314 for most viral species, which means that a lot of the variation of viral strain is not covered  
315 in a standard RefSeq database. KrakenHLL sources viral strain sequences from the NCBI  
316 Viral Genome Resource that are validated as ‘neighbors’ of RefSeq viruses, which leads  
317 to up to 20% more read classifications (see Suppl. Methods Section 4).

318 3. Hierarchical classification with multiple databases. Researcher’s may want to include  
319 additional sequence sets, such as draft genomes, in some searches. KrakenHLL allows to  
320 chain databases and match each k-mer hierarchically, stopping when it found a match.  
321 For example, to mitigate the problem of host contamination in draft genomes, a search  
322 may use the host genome as first database, then complete microbial genomes, then draft  
323 microbial genomes. More details are available in Suppl. Method Section 5.

324

## 325 **Timing and memory requirements**

326 The additional features of KrakenHLL come without a runtime penalty and very limited  
327 additional memory requirements. In fact, due to code improvements, KrakenHLL often runs



328 faster than Kraken, particularly when most of the reads come from one species. On the test  
329 dataset, the mean classification speed in million base-pairs per minute increased slightly from  
330 410 to 421 Mbp/m (see Suppl. Table 3). When factoring in the time needed to summarize  
331 classification results by kraken-report, which is required for Kraken but part of the classification  
332 binary of KrakenHLL, KrakenHLL is on average 50% faster. The memory requirements increase  
333 on average by 0.5 GB from 39.5 GB to 40 GB.

334

335 On the pathogen Id patient data, where in most cases over 99% of the reads were either assigned  
336 to human or synthetic reads, KrakenHLL was significantly faster than Kraken (Suppl. Table 5).  
337 The classification speed increased from 467 to 733 Mbp/m. The average wall time was about  
338 44% lower, and the average additional memory requirements were less than 1GB, going from  
339 118.0 to 118.4 GB. All timing comparisons were made after preloading the database and running  
340 with 10 parallel threads.

341

## 342 Discussion

343 In our comparison, KrakenHLL performed better in classifying metagenomics data than many  
344 existing methods, including the alignment-based methods Blast [16], Diamond [30], and  
345 MetaFlow [19]. Blast and Diamond results were post-processed by Megan [31], which assigns  
346 reads to the lowest-common ancestor (LCA), but ignores coverages when computing the  
347 resulting taxonomic profile. Thus, the taxonomic profile (with read counts as abundance  
348 measures) is sensitive to over-representing false positives that have coverage spikes in parts of  
349 the genome in the same way as non-alignment based methods. Coverage spikes may appear due  
350 to wrongly matched common sequences (e.g. 16S rRNA), short amplified sequences floating in

351 the laboratory, and contamination in database sequences. MetaFlow, on the other hand,  
352 implements coverage-sensitive mapping, which should give better abundance calls, but it did not  
353 perform very well in our tests. Going from alignments to a good taxonomic profile is difficult  
354 because coverage information cannot be as easily computed for the LCA taxon and summarized  
355 for higher levels in the taxonomic tree. In comparison, reads and unique k-mer counts can be  
356 assigned to the LCA taxa, and summed to higher levels. Notably, KrakenHLL's k-mer counting  
357 is affected by GC biases in the sequencing data the same way as other read classifiers and  
358 aligners [32], and may underreport GC-rich or GC-poor genomes.

359

## 360 Conclusions

361 KrakenHLL is a novel method that combines fast k-mer based classification with an efficient  
362 algorithm for counting the number of unique k-mers found in each species in a metagenomics  
363 dataset. When the reads from a species yield many unique k-mers, one can be more confident  
364 that the taxon is truly present, while a low number of unique k-mers suggests a possible false  
365 positive identification. We demonstrated that using unique k-mer counts provides improved  
366 accuracy for species identification, and that k-mer counts can help greatly in identifying false  
367 positives. In our comparisons with multiple other metagenomics classifiers on multiple  
368 metagenomics datasets, we found that KrakenHLL consistently ranked at the top. The strategy of  
369 counting unique k-mer matches allows KrakenHLL to detect that reads are spread across a  
370 genome, without the need to align the reads. By using a probabilistic counting algorithm,  
371 KrakenHLL is able to match the exceptionally fast classification time of the original Kraken  
372 program with only a very small increase in memory. The result is that KrakenHLL gains many of  
373 the advantages of alignment at a far lower computational cost.

374

## 375 Declarations

### 376 Availability of data and material

377 KrakenHLL  is implemented in C++ and Perl. Its source code is available at

378 <https://github.com/fbreitwieser/krakenhll>, licensed under GPL3. The version used in the

379 manuscript is permanently available under <https://doi.org/10.5281/zenodo.1252385>. Analysis

380 scripts for the results of this manuscript are available at

381 <https://github.com/fbreitwieser/krakenhll-manuscript-code>.

382

383 The datasets of McIntyre et al. are available at <https://ftp-private.ncbi.nlm.nih.gov/nist->

384 [immrsa/IMMSA](https://ftp-private.ncbi.nlm.nih.gov/nist-immrsa/IMMSA). The sequencing datasets of Salzberg et al. are available under the BioProject

385 accession PRJNA314149 (<https://www.ncbi.nlm.nih.gov/bioproject/PRJNA314149>). Note that

386 human reads have been filtered. The test datasets generated by sampling reads from bacterial

387 isolate SRA experiments are available at

388 <ftp://ftp.ccb.jhu.edu/pub/software/krakenhll/SraSampledDatasets>.

389

### 390 Funding

391 This work was supported in part by grants R01-GM083873 and R01-HG006677 from the

392 National Institutes of Health, and by grant number W911NF-14-1-0490 from the U. S. Army

393 Research Office.

394

## 395 **Acknowledgements**

396 Thanks to Jen Lu, Ales Varabyou, Thomas Mehoke, David Karig, Sharon Bewick and Peter  
397 Thielen for valuable discussions on the general method and its applicability. Thanks to Alexa  
398 McIntyre and Rachid Ounit for providing very quick answers, scripts and data to their  
399 benchmarking paper. Thanks to Daniel Baker for suggestions on the HyperLogLog algorithm,  
400 and to Jessica Atwell for proofreading the manuscript.

401

## 402 **Authors' contributions**

403 FPB conceived and implemented the method. FPB and SLS wrote the manuscript. All authors  
404 read and approved the final manuscript.

## 405 **Ethics approval and consent to participate**

406 Not applicable.

## 407 **Consent for publication**

408 Not applicable.

## 409 **Competing interests**

410 The authors declare that they have no competing interests.

411

## 412 **References**

- 413 1. Breitwieser FP, Lu J, Salzberg SL: **A review of methods and databases for**  
414 **metagenomic classification and assembly.** *Brief Bioinform* 2017.
- 415 2. Salter SJ, Cox MJ, Turek EM, Calus ST, Cookson WO, Moffatt MF, Turner P, Parkhill J,  
416 Loman NJ, Walker AW: **Reagent and laboratory contamination can critically impact**  
417 **sequence-based microbiome analyses.** *BMC Biol* 2014, **12**:87.
- 418 3. Thoendel M, Jeraldo P, Greenwood-Quaintance KE, Yao J, Chia N, Hanssen AD, Abdel  
419 MP, Patel R: **Impact of Contaminating DNA in Whole-Genome Amplification Kits**  
420 **Used for Metagenomic Shotgun Sequencing for Infection Diagnosis.** *J Clin Microbiol*  
421 2017, **55**:1789-1801.

- 422 4. Salzberg SL, Breitwieser FP, Kumar A, Hao H, Burger P, Rodriguez FJ, Lim M,  
423 Quinones-Hinojosa A, Gallia GL, Tornheim JA, et al: **Next-generation sequencing in**  
424 **neuropathologic diagnosis of infections of the nervous system.** *Neurol Neuroimmunol*  
425 *Neuroinflamm* 2016, **3**:e251.
- 426 5. Brown JR, Bharucha T, Breuer J: **Encephalitis diagnosis using metagenomics:**  
427 **application of next generation sequencing for undiagnosed cases.** *Journal of Infection*  
428 2018.
- 429 6. Mukherjee S, Huntemann M, Ivanova N, Kyrpides NC, Pati A: **Large-scale**  
430 **contamination of microbial isolate genomes by Illumina PhiX control.** *Stand*  
431 *Genomic Sci* 2015, **10**:18.
- 432 7. Dadi TH, Renard BY, Wieler LH, Semmler T, Reinert K: **SLIMM: species level**  
433 **identification of microorganisms from metagenomes.** *PeerJ* 2017, **5**:e3138.
- 434 8. Quince C, Walker AW, Simpson JT, Loman NJ, Segata N: **Shotgun metagenomics,**  
435 **from sampling to analysis.** *Nat Biotechnol* 2017, **35**:833-844.
- 436 9. Wood DE, Salzberg SL: **Kraken: ultrafast metagenomic sequence classification using**  
437 **exact alignments.** *Genome Biol* 2014, **15**:R46.
- 438 10. Flajolet P, Fusy É, Gandouet O, Meunier F: **HyperLogLog: the analysis of a near-**  
439 **optimal cardinality estimation algorithm.** In *AofA: Analysis of Algorithms; 2007-06-*  
440 *17; Juan les Pins, France.* Discrete Mathematics and Theoretical Computer Science;  
441 2007: 137-156.
- 442 11. Heule S, Nunkesser M, Hall A: **HyperLogLog in practice.** 2013:683.
- 443 12. Ertl O: **New Cardinality Estimation Methods for HyperLogLog Sketches.**  
444 *arXiv:170607290* 2017.
- 445 13. Brister JR, Ako-adjei D, Bao Y, Blinkova O: **NCBI Viral Genomes Resource.** *Nucleic*  
446 *Acids Research* 2015, **43**:D571-D577.
- 447 14. Irber Junior LC, Brown CT: **Efficient cardinality estimation for k-mers in large DNA**  
448 **sequencing data sets.** *bioRxiv* 2016.
- 449 15. McIntyre ABR, Ounit R, Afshinnekoo E, Prill RJ, Hénaff E, Alexander N, Minot SS,  
450 Danko D, Foox J, Ahsanuddin S, et al: **Comprehensive benchmarking and ensemble**  
451 **approaches for metagenomic classifiers.** *Genome Biology* 2017, **18**.
- 452 16. Altschul SF, Gish W, Miller W, Myers EW, Lipman DJ: **Basic local alignment search**  
453 **tool.** *J Mol Biol* 1990, **215**:403-410.
- 454 17. Huson DH, Auch AF, Qi J, Schuster SC: **MEGAN analysis of metagenomic data.**  
455 *Genome Res* 2007, **17**:377-386.
- 456 18. Buchfink B, Xie C, Huson DH: **Fast and sensitive protein alignment using**  
457 **DIAMOND.** *Nat Methods* 2015, **12**:59-60.
- 458 19. Sobih A, Tomescu AI, Mäkinen V: **MetaFlow: Metagenomic Profiling Based on**  
459 **Whole-Genome Coverage Analysis with Min-Cost Flows.** In *Research in*  
460 *Computational Molecular Biology.* 2016: 111-121: *Lecture Notes in Computer Science*].
- 461 20. Ounit R, Wanamaker S, Close TJ, Lonardi S: **CLARK: fast and accurate classification**  
462 **of metagenomic and genomic sequences using discriminative k-mers.** *BMC Genomics*  
463 2015, **16**:236.
- 464 21. Ounit R, Lonardi S: **Higher classification sensitivity of short metagenomic reads with**  
465 **CLARK-S.** *Bioinformatics* 2016, **32**:3823-3825.

- 466 22. Ames SK, Hysom DA, Gardner SN, Lloyd GS, Gokhale MB, Allen JE: **Scalable**  
467 **metagenomic taxonomy classification using a reference genome database.**  
468 *Bioinformatics* 2013, **29**:2253-2260.
- 469 23. Rosen GL, Reichenberger ER, Rosenfeld AM: **NBC: the Naive Bayes Classification**  
470 **tool webserver for taxonomic classification of metagenomic reads.** *Bioinformatics*  
471 2010, **27**:127-129.
- 472 24. Freitas Tracey Allen K, Li P-E, Scholz MB, Chain Patrick SG: **Accurate read-based**  
473 **metagenome characterization using a hierarchical suite of unique signatures.**  
474 *Nucleic Acids Research* 2015, **43**:e69-e69.
- 475 25. Truong DT, Franzosa EA, Tickle TL, Scholz M, Weingart G, Pasolli E, Tett A,  
476 Huttenhower C, Segata N: **MetaPhlan2 for enhanced metagenomic taxonomic**  
477 **profiling.** *Nat Methods* 2015, **12**:902-903.
- 478 26. Darling AE, Jospin G, Lowe E, Matsen FAt, Bik HM, Eisen JA: **PhyloSift: phylogenetic**  
479 **analysis of genomes and metagenomes.** *PeerJ* 2014, **2**:e243.
- 480 27. Simner PJ, Miller S, Carroll KC: **Understanding the Promises and Hurdles of**  
481 **Metagenomic Next-Generation Sequencing as a Diagnostic Tool for Infectious**  
482 **Diseases.** *Clinical Infectious Diseases* 2017.
- 483 28. Zhang C, Cleveland K, Schnoll-Sussman F, McClure B, Bigg M, Thakkar P, Schultz N,  
484 Shah MA, Betel D: **Identification of low abundance microbiome in clinical samples**  
485 **using whole genome sequencing.** *Genome Biology* 2015, **16**.
- 486 29. Breitwieser FP, Salzberg SL: **Pavian: Interactive analysis of metagenomics data for**  
487 **microbiomics and pathogen identification.** *BioRxiv* 2016.
- 488 30. Buchfink B, Xie C, Huson DH: **Fast and sensitive protein alignment using**  
489 **DIAMOND.** *Nature Methods* 2014, **12**:59-60.
- 490 31. Huson DH, Auch AF, Qi J, Schuster SC: **MEGAN analysis of metagenomic data.**  
491 *Genome Research* 2007, **17**:377-386.
- 492 32. Xu Y, Chen Y-C, Liu T, Yu C-H, Chiang T-Y, Hwang C-C: **Effects of GC Bias in Next-**  
493 **Generation-Sequencing Data on De Novo Genome Assembly.** *PLoS ONE* 2013, **8**.
- 494

**A** Read k-mers are looked-up in the database and assigned to taxa:

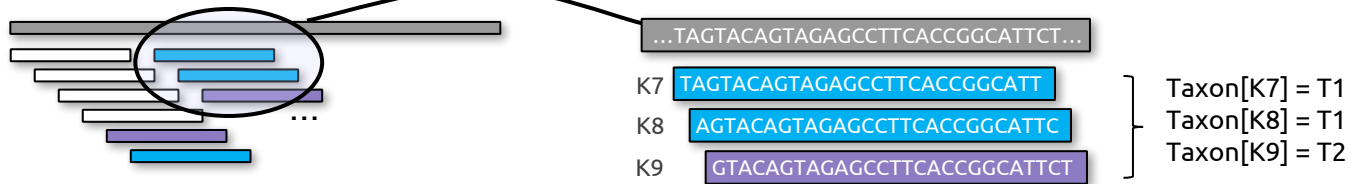

**B** For each taxon a data sketch records its k-mers for cardinality estimation

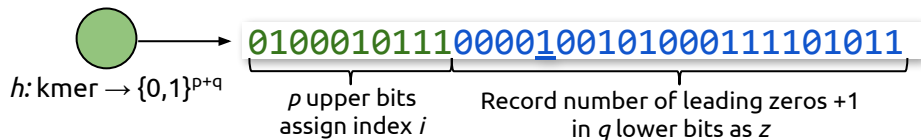

The maximum number of leading zeros are recorded in registers  $M$

Estimated number of unique values for register  $M[j]: \sim 2^{M[j]}$

**C** K-mer count and coverage in taxonomic report show evidence behind classifications:

| reads | kmers | dup  | cov    | taxID | rank          | name                            |
|-------|-------|------|--------|-------|---------------|---------------------------------|
| 122   | 112   | 144  | 0.0004 | 11855 | species       | <i>Clostridioides difficile</i> |
| 9650  | 7129  | 74.5 | 0.192  | 10632 | species       | Human polyomavirus 2            |
| 15    | 1570  | 1    | 0.0002 | 7643  | species group | <i>Mycobacterium tb</i> complex |

Bad classification with few k-mers

Good classification, reads cover genome

Number of distinct k-mers for taxon, and coverage of the taxon's k-mers

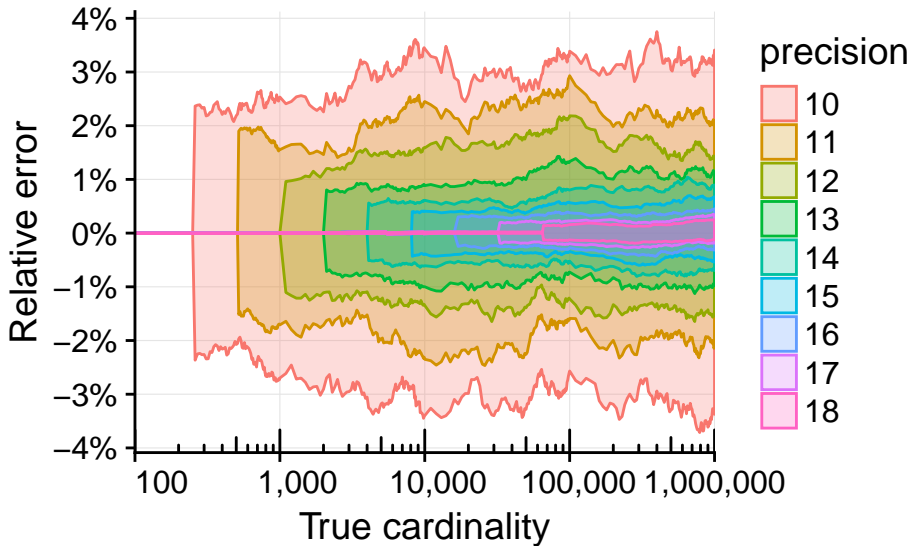



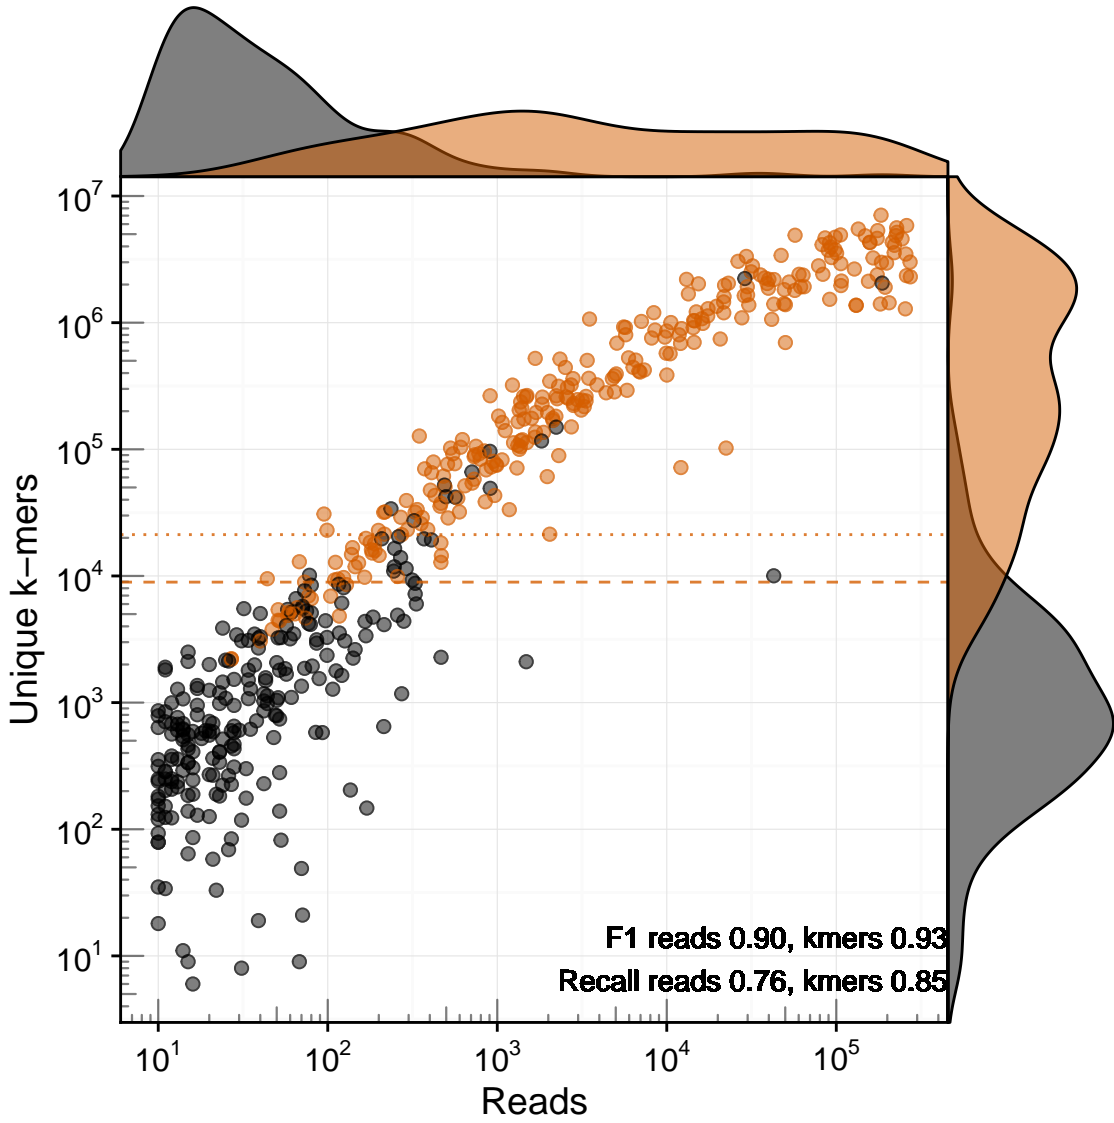

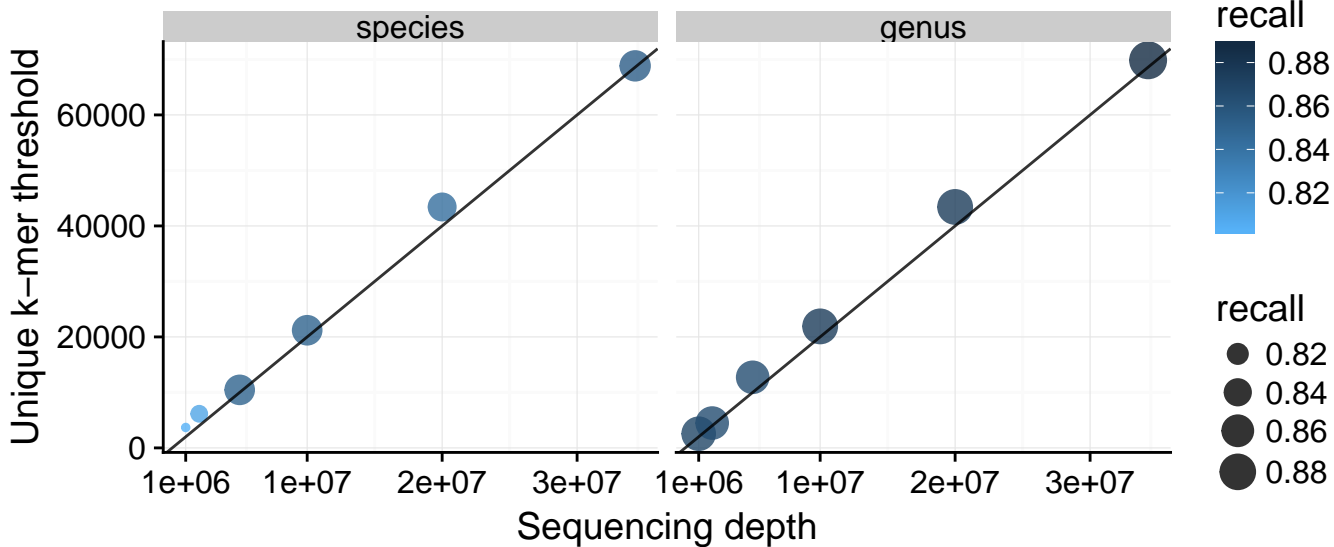

Source: https://www.biorxiv.org/content/10.1101/262956v3.full.pdf
